# Supplementary material
Source: PubMed Central journal article supplement (PMC8776317)
Supplement: mmc1.pdf [file mmc1.pdf]

# THE LANCET

## Supplementary appendix

This appendix formed part of the original submission. We post it as supplied by the authors.

Supplement to: Alfieri C, Egrot M, Desclaux A, Sams K, on behalf of CoMeSCov.  
Recognising Italy's mistakes in the public health response to COVID-19. *Lancet* 2022;  
**399**: 357-58.

CoMeSCoV (Containment and health measures to limit COVID-19 transmission: Social experiences in France, Italy, and the USA in the time of a pandemic), led by co-PIs Marc Egrot<sup>1</sup> and Sandrine Musso<sup>3</sup>:

Research team members:

Chiara Alfieri<sup>1,2</sup>  
Fleur Beauvieux<sup>1</sup>,  
Algassime Diallo<sup>1</sup>,  
Firmin Kra<sup>1,4</sup>,  
Carlotta Magnani<sup>3</sup>,  
Francesca Mininel<sup>1</sup>,  
Kelley Sams<sup>1,5</sup>

This research was funded by support from REACTing (Research and Action: Targeting Emerging Infectious Disease) and the French National Research Agency (ANR grant ANR-20-COVI-000),

This article would never have seen the light of day without the contributions of Sandrine Musso, co-coordinator of the CoMeSCoV Programme, who passed away on 7 August 2021 in Marseille.

<sup>1</sup>Laboratoire Population, Environnement, Démographie (LPED, UMR 151, Institut de Recherche pour le Développement, Aix-Marseille University), Marseille, France.

<sup>2</sup>Recherches Translationnelles sur le VIH et les Maladie Infectieuses (TransVIHMI, UMR 233-IRD, 1175 INSERM, Montpellier University), Montpellier, France.

<sup>3</sup>Centre Norbert Elias, (CNE), Aix-Marseille University, CNRS, EHESS, Avignon University, Marseille, France.

<sup>4</sup>UNESCO Chair in Bioethics, A. Ouattara University, Bouaké, Ivory Coast.

<sup>5</sup>Walden University, MN, USA.

All research group members are also members of the Réseau Ouest Africain Anthropologie des Epidémies Emergentes (RAEE).
